# Supplementary material
Source: publisher site journal article supplement (https://www.dovepress.com/article/421133)
Supplement: Supplementary file 1 [file get_supplementary_file.php]

## Supplementary Material 1 Summary of National Health Commission of China for Guiding Principle of Clinical Use of Antibiotics (2015 Edition)

1. **The diagnosis of bacterial infection has the indication of the application of antibiotics.**

According to the patient’s signs of symptoms, laboratory tests and imagological examination results to determine the indications for the application of antibiotics.

1. **The cases without pathogenic results can be taken an empirical therapy according to the clinical manifestation.**

For patients diagnosed with bacterial infection clinically, the possible pathogens can be inferred from the infection site, the underlying disease, the incidence, the place of onset, the history of previous antimicrobial drugs and their therapeutic response, and combined with local bacterial resistance monitoring data, before the bacterial culture and drug sensitivity results are known, or when the cultured specimens cannot be obtained. First give the experience of antimicrobial drugs treatment; for patients with negative culture results, further diagnostic measures can be taken according to the effect of empirical treatment and the patient's situation.

1. **The antimicrobial therapeutic regimen was developed by synthesizing of the patients ' condition, pathogenic bacteria and antimicrobial characteristics as following.**

- Choosing, to the extent possible, highly targeted, narrow-spectrum, safe and affordable antimicrobial drugs. Patients with empirical therapy can choose antimicrobial drugs according to possible pathogens and local drug resistance status.
- Generally according to the treatment dose range of various antimicrobial drugs.
- For the majority of patients with mild to moderate infection, oral treatment should be given first, and oral and well-absorbed antimicrobial varieties should be selected without the need for intravenous or intramuscular injections of the drug. Local application of antimicrobial drugs should be avoided as far as possible.
- Antimicrobial treatment varies depending on the infection, it is generally appropriate to use to reach to normal body temperature, symptoms subside 72-96 hours after, there are local lesions need to be used to the infection focus control or complete dissipation.
- Infections that are treatable effectively with a single drug and combination is not required, unless the cases of severe mixed infections, immune defects, drug-resistant bacterial infections that require prolonged treatment, and the use of more toxic antibiotics.

**Supplementary Table 1** Principles of empirical antibiotic treatment for various bacterial infections

| **Disease classification** | **Common pathogenic bacteria** | **Main diagnosis and treatment principles** | **Preferred antibiotic** |
| --- | --- | --- | --- |
| Acute bacterial pharyngitis and tonsillitis | Group A hemolytic Streptococcus | The pathogen was diagnosed by pharyngeal swab culture and rapid antigen test (RADT) before administration, and antimicrobial drugs were selected for hemolytic streptococcus infection. | Intramuscular injection of penicillin G, oral amoxicillin |
| Acute tracheal-bronchitis | Most are viral infections, and a few are mycoplasma, chlamydia or pertussis Bordetella infections. | Symptomatic treatment is the mainstay and antibiotics should not be routinely used. | If a few are mycoplasma, chlamydia or pertussis Bordetella infection, macrolides are used. |
| Community-acquired pneumonia | Streptococcus pneumoniae, Mycoplasma pneumoniae, Haemophilus influenzae, chlamydia pneumoniae, etc | Patients with mild symptoms and normal gastrointestinal function can choose oral drugs with good bioavailability. In severe cases, intravenous administration was used, and oral administration was used when clinical symptoms improved significantly and oral administration was possible. | Penicillin, Amoxicillin, Doxycycline, Minocycline, First or second generation cephalosporins, Respiratory quinolones* |
| Periodontitis, pericoronitis, around the apex | Streptococcus mutans | Local treatment is the main, antimicrobial treatment as a supplement. | Oral amoxicillin |
| Viral diarrhea | Rotavirus, Norwalk-like virus, enteroadenovirus, etc | Symptomatic treatment |  |
| Furuncle and carbuncle | Staphylococcus aureus | 1. Mild skin and soft tissue infections generally do not require systemic application of antibiotics, only local use. Topical administration is dominated by antiseptic preservatives (e.g. iodophor), and in rare cases, some antibiotics mainly for topical use may also be used.  2. Moderate, severe or complex skin and soft tissue infections require systemic application of antibiotics. | 1. Mild condition: local treatment mainly, mupirostar ointment, yushi ester ointment  2. Severe condition with sepsis: resistance to the enzyme penicillin such as benzacillin or cefazolin or cefuroxime. Glycopeptides can be selected for MRSA |
| Impetigo | Staphylococcus aureus, group A hemolytic streptococcus | 1. Mild skin and soft tissue infections generally do not require systemic application of antibiotics, only local use. Topical administration is dominated by antiseptic preservatives (e.g. iodophor), and in rare cases, some antibiotics mainly for topical use may also be used.  2. Moderate, severe or complex skin and soft tissue infections require systemic application of antibiotics. | Mupiroxacin ointment for topical use, penicillin, enzyme-resistant penicillin (e.g., benzacillin) |
| Acute cellulitis | A Group of hemolytic streptococcus | It is a systemic, severe or complex skin and soft tissue infection that requires the whole body to be used as an antibiotics. | Penicillin, amoxicillin oral |
| Urinary tract infection (cystitis, pyelonephritis) | Escherichia colii | 1. For patients with initial onset of acute simple lower urinary tract infection, oral medication is preferred, and antibiotics with low toxicity and good oral absorption are appropriate. The course of treatment is usually 3 to 5 days. 2. Patients with acute pyelonephritis accompanied by fever and other obvious systemic symptoms should be given the drug by injection. After the fever, the drug can be given orally. The course of treatment is generally 2 weeks. Patients with recurrent pyelonephritis need a longer course of treatment and special attention should be paid to preventive measures. | 1. Acute pyelonephritis: Ampicillin or amoxicillin or first, second and third generation cephalosporins 2. Recurrent urinary tract infections: Piperacillin/tazobactam or ammonia Benzillin/Sulbactam or Amoxy Linn/clavulanic acid |
| Pelvic inflammatory | Neisseria gonorrhoeae, Enterobacteriaceae, Streptococcus and Bacteroides fragilis, Streptococcus digesticus, Bacillus perfringens and other anaerobic bacteria, as well as Chlamydia trachomatis, Ureaplasma urealyticum and viruses. | The dosage of antibiotics should be enough, the course of treatment should be 14 days, so as to avoid repeated attacks or chronic disease. The initial treatment of severe symptoms should be intravenous administration, which can be changed to oral administration after improvement. | Second or third generation cephalosporins + metronidazole / tinidazole + doxycycline / azithromycin |
| Acute bacterial otitis media | Streptococcus pneumoniae, Haemophilus influenzae and Moraxella catarrh were the most common pathogens | 1. antibiotic treatment should cover Streptococcus pneumoniae, Haemophilus influenzae and Moraxella catarrh, etc.  2. The course of treatment is 7 ~ 10 days to reduce recurrence. | Oral amoxicillin |
| Pathogenic escherichia coli enteritis | 1. Enterotoxin, enterogenicity, enteroinvasiveness 2. Enterobacteriaceae 3. Enterohaemorrhagic | Replenish fluids and electrolytes in time according to clinical conditions. Feces were collected for routine fecal culture, bacterial culture and drug sensitivity test. Combined with clinical conditions, antibiotics were given. If the clinical efficacy is not satisfied, the drug can be adjusted according to the results of drug sensitivity test. Mild cases can be taken orally; The serious case should be intravenous medication, the condition improves and can be oral instead of oral. | 1. Enterotoxin, enterogenicity, enteroinvasiveness: the second and third generation cephalosporins 2. Enterobacteriaceae: the effect of antimicrobial therapy is uncertain 3. Enterohaemorrhagic: not use antibiotics |
| Antibiotic-associated diarrhea or pseudomembranous enteritis | Clostridium difficile | Replenish fluids and electrolytes in time according to clinical conditions. Feces were collected for routine fecal culture, bacterial culture and drug sensitivity test. Combined with clinical conditions, antibiotics were given. If the clinical efficacy is not satisfied, the drug can be adjusted according to the results of drug sensitivity test. Mild cases can be taken orally; The serious case should be intravenous medication, the condition improves and can be oral instead of oral. | Metronidazole |
| Bacterial keratitis | Common pathogens are pseudomonas aeruginosa, Staphylococcus aureus, streptococcus pneumoniae, enterobacteriaceae bacteria. | 1. As soon as clinical diagnosis is made, empirical treatment with antibiotics should be given immediately, and broad-spectrum strong antibiotics should be the first choice. 2. The main route of administration was local eye drop and subconjunctival injection. Patients with a large amount of hyphema should be administered intravenously at the same time. | Levofloxacin / Ofloxacin / Tobramycin |

## Supplementary Material 2 National Catalog for Clinical Application of Antimicrobial Agents

| **Category** | **Un****restricted class** | **Restricted class** | **Special class** |
| --- | --- | --- | --- |
| Penicillins | Penicillin | Azlocillin | Pipercillin/  Sulbactam |
| Oxacillin | Mezlocillin | Pipercillin/  Tazobactam |
| Amoxicillin | Ampicillin/  Sulbactam | Mezlocillin/  Sulbactam |
| Ampicillin | Ticarcillin/  Clavulnic acid | Amoxicillin/  Sulbactam |
| Piperacillin | Sulbenicillin | Amoxicillin/  Fluloxacillin |
| Amoxicillin/  Clavulanic acid | Flucloxacillin | Ampicillin/  Cloxacillin |
| Procaine Benzylpenicillin | Ticarcillin | Meloxicillin/  Tazobactam |
| Penicillin V |  | Ticacillin/  Tazobactam |
| Cloxacillin |  | Lenampicillin |
| Carbenicillin |  | Nafcillin |
|  |  | Sultamicillin |
|  |  | Furbucillin |
|  |  | Dicloxacillin |
| Cephalosporins | Cephalexin | Cefotaxime | Cefpirome |
| Cefazolin | Ceftazidime | Cefepime |
| Cefuroxime | Cefixime | Cefminox |
| Ceftriaxone | Cefdinir | Latamoxef |
| Cefadroxil | Cefoperazone/  Sulbactam | Cefoperazone/  Tazobactam |
| Cefradine | Cefotiara | Ceftriaxone/  Sulbactam |
| Cefaclor | Cefathiamidine | Ceftazidime/  Sulbactam |
| Cefprozil | Ceftizoxime | Cefotaxime/  Sulbactam |
|  | Cefoxitin | Cefpiramide |
|  | Cefpodoxime | Cefoselis |
|  | Cefoperazone | Cefapirin |
|  |  | Cephalothin |
|  |  |  |
|  |  | Cefamandole |
|  |  | Cefodizime |
|  |  | Cefetametester |
|  |  | Cefonicid |
|  |  | Cefteram pivoxil |
|  |  | Cefmenoxime |
|  |  | Ceftibuten |
|  |  | Loracarbef |
|  |  | Cefuroxime/  Sulbactam |
|  |  | Cefotaxime/  Tazobactam |
|  |  | Ceftriaxone/  Trizobactam |
|  |  | Ceftazidime/  Sulbactam |
| Other β-lactams |  | Aztreonam | Sulbactam |
|  | Cefmetazole | Flomoxef |
|  |  | Cefotetan |
| Carbapenems |  | Ertapenem | Meropenem |
|  |  | Imipenem/  Cilastatin |
|  |  | Faropenem |
|  |  | Panipenem/  Betamipron |
|  |  | Biapenem |
|  |  | Panipenem |
|  |  | Doripenem |
| Aminoglycosides | Amikacin | Etimicin | Netilmicin |
| Gentamicin | Tobramycin | Isepamicin |
| Streptomycin | Spectinomycin | Micronomicin |
|  | Neomycin | Paromomycin |
|  |  | Sisomicin |
|  |  | Dibekacin |
|  |  | Arbekacin |
|  |  | Ribostamycin |
| Amide alcohols |  | Chloramphenicol |  |
| Tetracyclines | Tetracycline |  | Tigecycline |
| Minocycline |  |  |
| Doxycycline |  |  |
| Oxytetracycline |  |  |
| Macrolides | Erythromycin | Dirithromycin | Telithromycin |
| Erythromycin estolate | Clarithromycin |  |
| Erythromycin ethylsuccinate | Azithromycin |  |
| Acetylspiramycin |  |  |
| Roxithromycin |  |  |
| Josamycin |  |  |
| Kitasamycin |  |  |
| Midecamycin |  |  |
| Glycopeptides |  |  | Vancomycin |
|  |  | Norvancomycin |
|  |  | Teicoplanin |
| Lincosamides | Clindamycin |  |  |
| Lincomycin |  |  |
| Quinolones | Norfloxacin | Gemifloxacin | Fleroxacin |
| Ciprofloxacin | Lomefloxacin | Pazufloxacin |
| Ofloxacin | Moxifloxacin | Sparfloxacin |
| Pipemidic acid | Levofloxacin | Enoxacin |
|  |  | Pefloxacin |
|  |  | Rufloxacin |
|  |  | Gatifloxacin |
|  |  | Antofloxacin |
| Nitrofurans | Nitrofurantoin |  |  |
| Furazolidone |  |  |
| Nitroimidazoles | Metronidazole | Ornidazole | S-Ornidazole |
| Tinidazole |  | Secnidazole |
| Sulfonamides | Sulfamethoxazole and trimethoprim |  |  |
| Sulphadiazine |  |  |
| Trimethoprim |  |  |
| Sulfotrimethoprim |  |  |
| Sulfamethoxazole |  |  |
| Others | Fosfomycin | Colistin | Fusidic acid |
|  | Rifaximin | Polymyxin B |
|  |  | Linezolid |
| Antifungal drugs | Nystatin | Itraconazole (Oral dosage forms) | Micafungin |
| Fluconazole | Ketoconazole | Caspofungin |
| Flucytosine |  | Voriconazole |
| Terbinafine |  | Amphotericin B |
| Clotrimazole |  | Itraconazole (Intravenous formulations) |
| Miconazole |  | Posaconazole |
|  |  | Anidulafungin |

## Supplementary Material 3 Survey on the utilization patterns, satisfaction levels, and suggestions of the Reference Manual for Diagnosis and Rational Use of Antimicrobial Agents for Outpatient Primary Care (Digestive System Part)

**Dear Primary Care Physicians:**

Hello! We are a research team from Guizhou Medical University dedicated to promoting the correct diagnosis of digestive system diseases and the rational use of antimicrobial agents. We are conducting a survey to understand your utilization patterns, satisfaction levels, and suggestions regarding the *Reference Manual for Diagnosis and Rational Use of Antimicrobial Agents for Outpatient Primary Care (Digestive System Part)*, hereinafter referred to as the “reference manual”. Your valuable input will help us improve the manual's applicability.

This questionnaire is completely anonymous, and your personal information will not be disclosed. The survey results will only be used for academic research purposes and will not have any impact on you. Please rest assured that your responses will remain confidential. Thank you very much for taking the time to participate in this survey. Your support and cooperation are greatly appreciated!

Sincerely,

Research Team from Guizhou Medical University

July 2021

1. This reference manual is easy to use.

A. Agree B. Neutral

C. Disagree, please provide your reasons:

2. This reference manual shortens the time to diagnosis.

A. Agree B. Neutral C. Disagree

3. This reference manual is helpful to you in prescribing antimicrobial agents.

A. Agree B. Neutral C. Disagree

4. This reference manual is conducive to improving my knowledge and expertise.

A. Agree B. Neutral C. Disagree

5. How often do you use the reference manual?

A. 2-3 times a week B. 4-5 times a week C. Every day

6. Are you satisfied with the reference manual?

A. Satisfied B. Neutral

C. Not satisfied, please provide your reasons:

7. It is necessary for primary care providers to use the reference manual.

A. Necessary

B. Not necessary, please provide your reasons:

8. Will you recommend the reference manual to other outpatient physicians?

A. Yes

B. No, please provide your reasons:

9. The contents of the reference manual are applicable to primary care settings.

A. Yes

B. Not please provide your reasons:

10. Is there any difference between the contents of the reference manual and daily clinical or medication practices?

A. Yes, please specify:

B. No, any other suggestions

**Thank you very much for taking the time to participate in this survey. Your support and cooperation are greatly appreciated!**
